# Supplementary material for: Size dependent targeted delivery of gold nanoparticles modified with the IL-6R-specific aptamer AIR-3A to IL-6R-carrying cells
Source: Royal Society of Chemistry journal article supplement (doi:10.1039/c7nr02973j), 2017-01-01
Supplement: c7nr02973j1.pdf [file c7nr02973j1.pdf]

Supplementary Information for

**Size Dependent Targeted Delivery of Gold  
Nanoparticles Modified with the IL-6R-Specific  
Aptamer AIR-3A to IL6-R-carrying Cells**

Lisa Prisner,<sup>\*a</sup> Nadine Bohn,<sup>\*a</sup> Ulrich Hahn,<sup>b</sup> and Alf Mews<sup>a</sup>

<sup>a</sup> *Universität Hamburg, Institute for Physical Chemistry, Grindelallee 117, 20146 Hamburg, germany. Fax: (0049)-(0)40-42838-7727; Tel: (0049)-(0)40-42838-3431;*

*Email: Alf.Mews@chemie.uni-hamburg.de*

<sup>b</sup> *Universität Hamburg, Institute for Biochemistry and Molecular Biology, Martin-Luther-King-Platz 6, 20146 Hamburg, germany.*

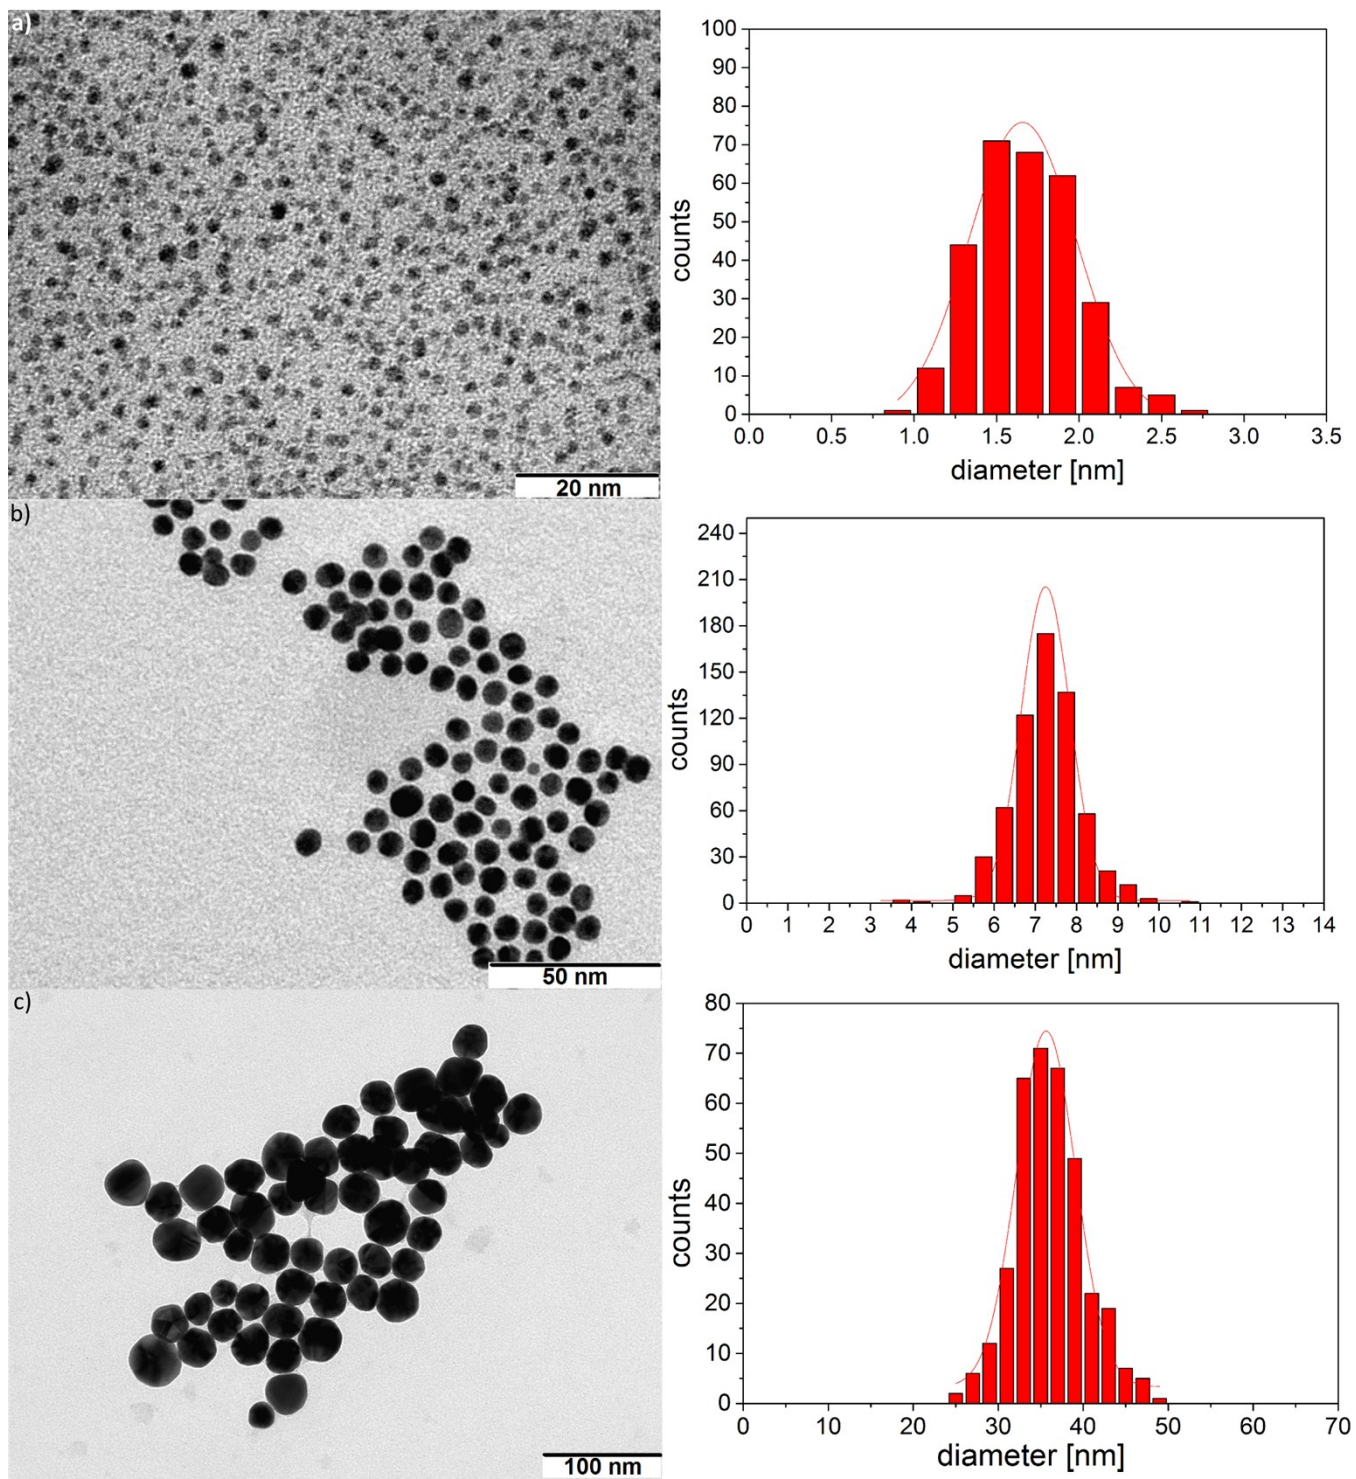

**Figure S1:** TEM-Images and size distribution for citrate-stabilized a) 1.7 nm gold particles, b) 7.3 nm gold particles and c) 36 nm gold particles

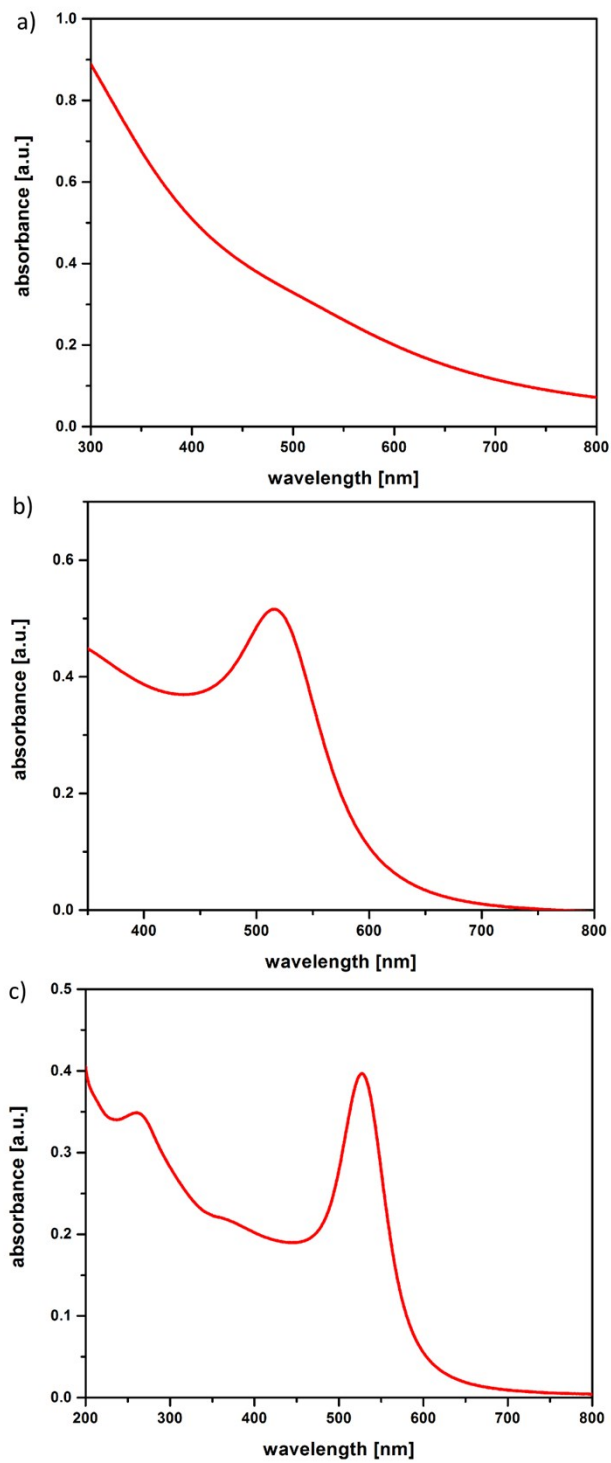

**Figure S2:** UV-Vis spectra for citrate-stabilized a) 1.7 nm gold particles, b) 7.3 nm gold particles and c) 36 nm gold particles

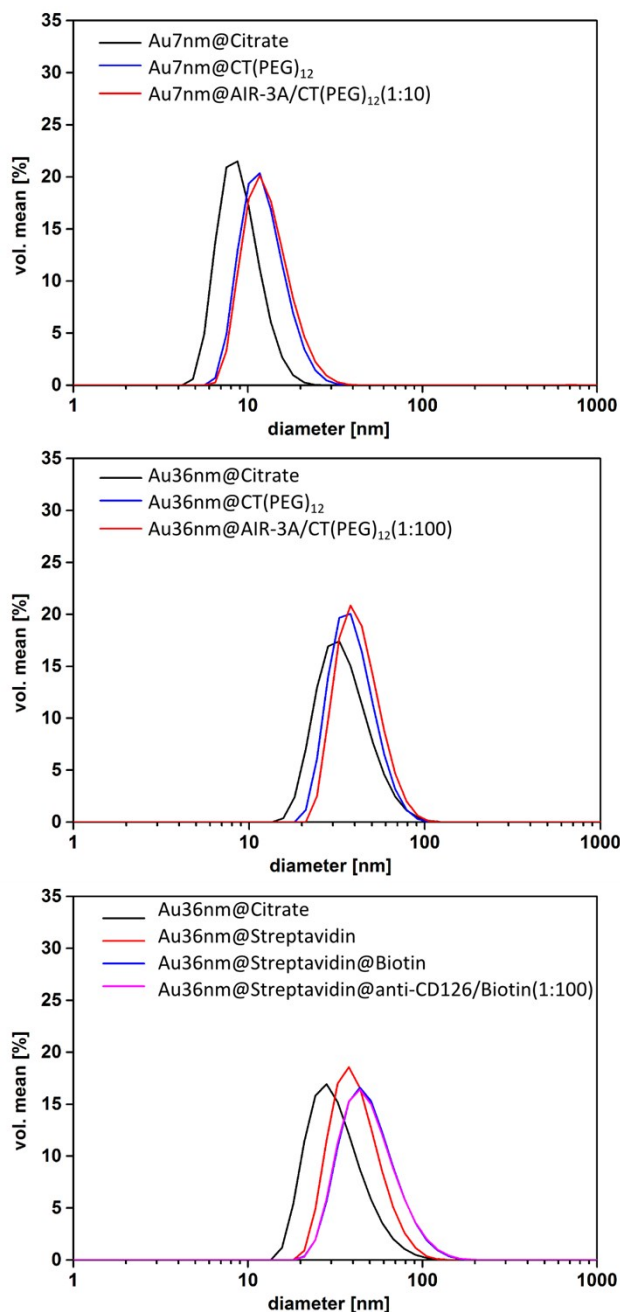

**Figure S3:** Hydrodynamic diameter determined by dynamic light scattering for (a) citrate-stabilized, aptamer-functionalized and PEG-coated 7 nm gold particles, (b) citrate-stabilized, aptamer-functionalized and PEG-coated 36 nm gold particles, and (c) citrate-stabilized, streptavidin coated, antibody-functionalized as well as biotin-saturated 36 nm gold particles.

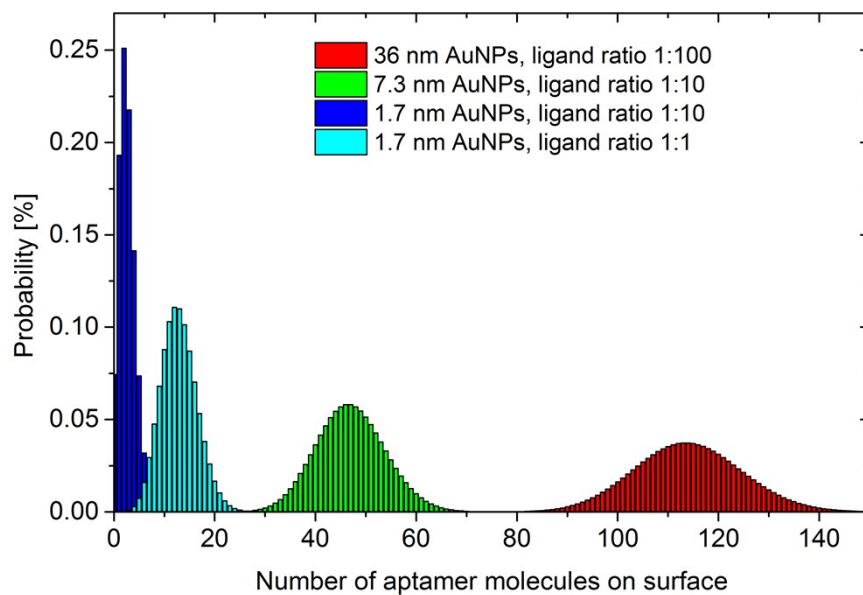

**Figure S4:** Poisson distribution of amount of aptamer molecules on the differently sized gold nanoparticles, employing ligand ratios of aptamer to PEG of 1:1, 1:10 or 1:100.
